# Supplementary material for: The catalytic efficiency of Fe-porphyrins supported on multi-walled carbon nanotubes in the heterogeneous oxidation of hydrocarbons and sulfides in water
Source: Royal Society of Chemistry journal article supplement (doi:10.1039/c3cy00554b), 2013-10-30
Supplement: c3cy00554b.pdf [file c3cy00554b.pdf]

## Supporting Information

### Catalytic Efficiency of Fe-Porphyrins Supported on Multi-Walled Carbon Nanotube in Heterogeneous Oxidation of Hydrocarbons and Sulfides in Water

Abdolreza Rezaeifard, and Maasoumeh Jafarpour

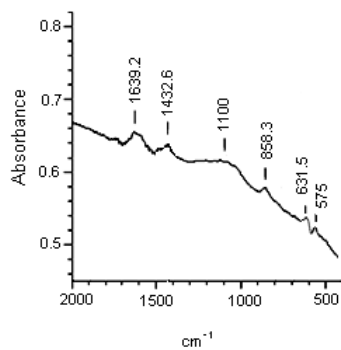

**Fig. S 1.** FT-IR spectrum of Fe(Br<sub>4</sub>TPP)Cl-MWCNT

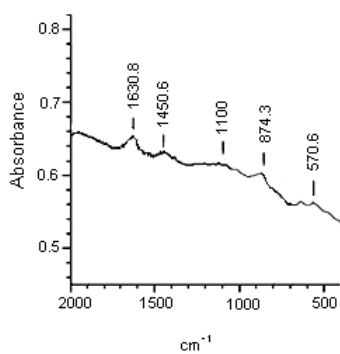

**Fig. S 2.** FT-IR spectrum of Fe[T(*o*-CIP)P]Cl-MWCNT

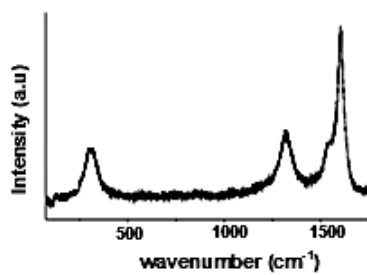

Fig. S 3. Raman spectrum of Fe(Br<sub>4</sub>TPP)Cl-MWCNT

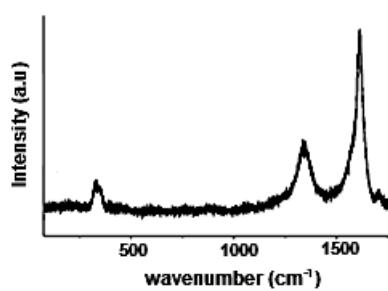

Fig. S 4. Raman spectrum of Fe[T(*o*-CIP)P]Cl-MWCNT

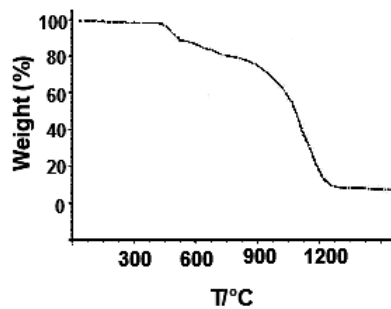

Fig. S 5. TGA thermograms of Fe(Br<sub>4</sub>TPP)Cl-MWCNT

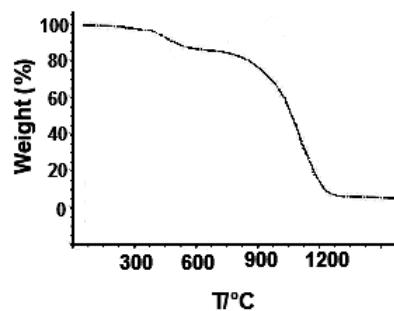

**Fig. S 6.** TGA thermograms of Fe[T(*o*-CIP)P]Cl-MWCNT

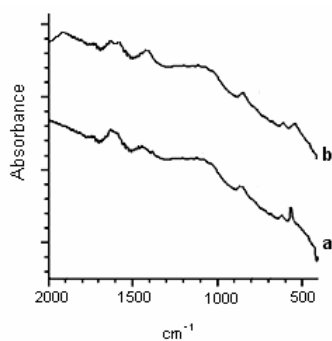

**Fig. S 7.** FT-IR spectra of fresh Fe(TPP)Cl-MWCNT (a) and after 10 reuses (b) in the epoxidation of cyclooctene in water.
